# Supplementary material
Source: MDPI journal article supplement (https://www.mdpi.com/2624-8549/2/4/53)
Supplement: s1 [file s1]

## Supporting information

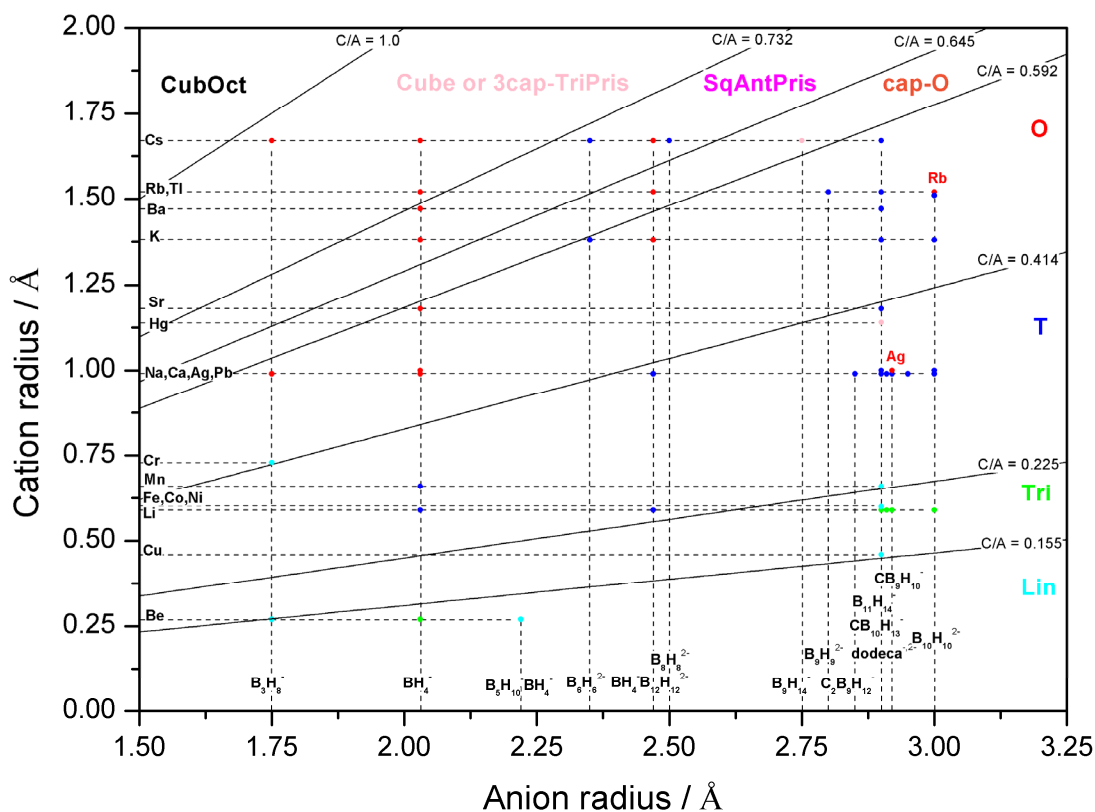

**Figure S1:** Cation coordination in single metal hydroborates as a function of cation/anion radius ratio  $C/A$ . The regions of various coordination polyhedra are calculated according to the first Pauling rule: linear (Lin), triangular (Tri), tetrahedral (T), octahedral (O), mono-capped octahedral (cap-O), square anti-prismatic (SqAntPris), cubic (Cube), tri-capped trigonal prismatic (3cap-TriPris), cuboctahedral (CubOct). The color code of the observed coordination (data point) is the same as for the predicted regions.

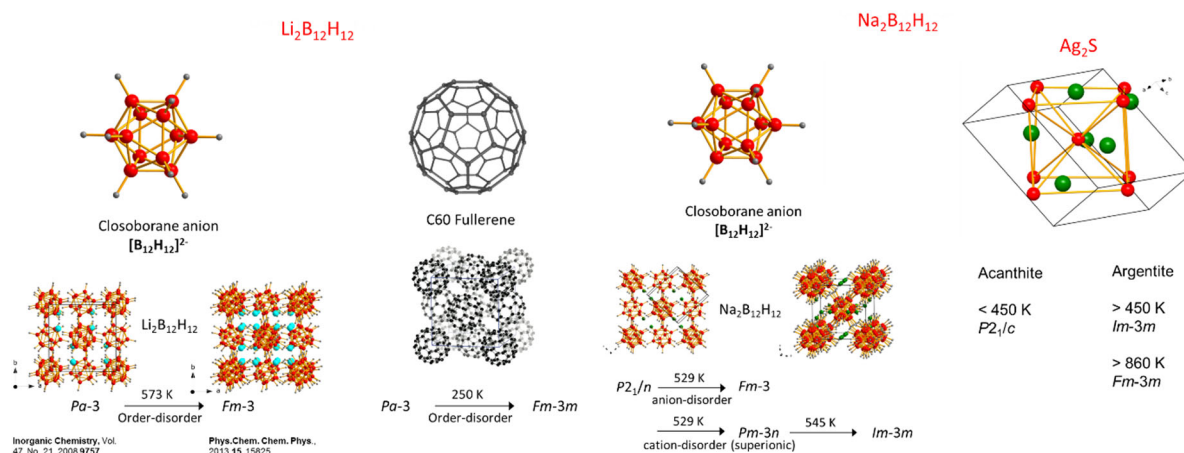

**Figure S2:** Analogy between temperature polymorphs of Li<sub>2</sub>B<sub>12</sub>H<sub>12</sub> and C60, and between Na<sub>2</sub>B<sub>12</sub>H<sub>12</sub> and Ag<sub>2</sub>S.
